# Supplementary material
Source: bioRxiv or medRxiv preprint supplement (https://medrxiv.org/highwire/filestream/93444/field_highwire_adjunct_files/2/2020.08.15.20174284-3.pdf)
Supplement: Supplementary file [file 2020.08.15.20174284-3.pdf]

```

#!/bin/bash -e

#####
#####
#
# Proc script for group level stats, for combining DTI data
with other
# subject information (FATCAT-MVM processing)
#
#####
#####

# Step1: load the DTI '*.grid' file. '* MVMtbl.txt' and
# '*_MVMprep.log' files will be generated.
fat_mvm_prep.py \
  -p DTI_Fluency \
  -c scores_for_all_Fluency.csv \
  -l PATH_0M.1D

# Step2: create a 3dMVM script.
fat_mvm_scripter.py \
  -p 'DTI_Fluency' \
  -v 'type dur age score' \
  --table='DTI_Fluency_MVMtbl.txt' \
  --log_file='DTI_Fluency _MVMprep.log'

# Step3: setup ANCOVA model in AFNI's '3dMVM' program to
compute the
# phenotype effect on DTI measures.
3dMVM \
  -prefix DTI_Fluency_MVM \
  -bsVars "type*dur*age*score" \
  -wsVars "ROI" \
  -qVars "dur,age,score"

# Step4: Compute characteristics of white matter alterations
related
# to FAS verbal fluency scores in PD-N.
3dMVM \
  -prefix DTI_Fluency _MVM \
  -bsVars "score+age+dur+type" \
  -wsVars "ROI" \
  -qVars "score,age,dur"

```
